# Supplementary material
Source: MDPI journal article supplement (https://www.mdpi.com/2227-7390/12/9/1336)
Supplement: s1 [file s1]

Archive with 2 entries (2 files):
- average results .pdf
- Box plots.pdf
